# Supplementary material for: During Water Stress, Fertility Modulated by ROS Scavengers Abundant in Arabidopsis Pistils
Source: MDPI journal article supplement (doi:10.3390/plants12112182), 2023-05-31
Supplement: s1 [file s1]

## SUPPLEMENTAL DATA

**Supplemental Table S1.** Primers used in this study.

| Primer ID   | Sequence (5' to 3')        | Purpose                              |
|-------------|----------------------------|--------------------------------------|
| ACT2 qF4    | ATTCCAGCAGATGTGGATCTC      | qPCR and RT-PCR,<br>internal control |
| ACT2 qR4    | AGCCTTTGATCTTGAGAGCTTAG    | qPCR and RT-PCR,<br>internal control |
| PER17 qF3   | TTCCAACATCGATTCACTAAGATC   | qPCR                                 |
| PER17 qR3   | CCAATCTGGTCCTCCTGTAAG      | qPCR                                 |
| PER28 qF1   | TGGGATCGCGTCTTGTGGTA       | qPCR                                 |
| PER28 qR1   | TTAGCCTGCCAGCCAAAGTG       | qPCR                                 |
| PER29 qF1   | GCAAACACGTGGCAGACTCT       | qPCR                                 |
| PER29 qR1   | TATCGTATGTGCACCCATGATG     | qPCR                                 |
| PER17 F     | TGTCTCTTCTTCCCATCTC        | RT-PCR and<br>genotyping             |
| PER17 3UTR  | TCTTCTCTTTACTAATGATAATTC   | RT-PCR                               |
| PER28 F     | CGTTTTCTGTTCTACTCTTGC      | RT-PCR and<br>genotyping             |
| PER28 3UTR  | ATCATCAGAAGCGGAAATTAAG     | RT-PCR                               |
| PER29 F     | AGAATCTACAGCTGCATCATG      | RT-PCR and<br>genotyping             |
| PER29 3UTR  | ACATTTGATAATTATAAATATACATC | RT-PCR                               |
| AT3G42570 F | ATGGAGACAAAGAAAGAAAAG      | Cloning                              |

|            |                                  |                                        |
|------------|----------------------------------|----------------------------------------|
| AT3G42570  | TTATAAATATATACCCATAATG           | Cloning                                |
| R          |                                  |                                        |
| APX4 2F    | CTGTTTCCTTCCTTCACCAAC            | RT-PCR and<br>genotyping               |
| APX4 2R    | AGTTTGCTCAGATTGATCCGT            | RT-PCR and<br>genotyping               |
| PER17 EcoF | GAATTCAAGTATGTCTCTTCTTCC         | pEW201ML construct                     |
| 201ML R    | GAATTCTAGATACAAGCAATACATC        | pEW201ML construct                     |
| 401ML F    | AGGCCTTCGAATTCAAGTATGTCTCTTCTTCC | pEW401ML construct                     |
| PER17 EcoR | GAATTCAAGATACAAGCAATAC           | pEW401ML construct                     |
| PER28 StuF | AGGCCTAACAAGATGAAGATTGCAAC       | pEW202ML and<br>pEW402ML<br>constructs |
| 202ML R    | GAATTCCGTTGAATGCTCTACAATTCTG     | pEW202ML construct                     |
| PER28 EcoR | GAATTCTTTAGTTGAATGCTCTAC         | pEW402ML construct                     |
| PER29 StuF | AGGCCTATGAAACCAAAGAGCAAAG        | pEW203ML and<br>pEW403ML<br>constructs |
| 203ML R    | GAATTCCATCAACCTTGTCACACAC        | pEW203ML construct                     |
| PER29 EcoR | GAATTCAATCAACCTTGTCACAC          | pEW403ML construct                     |
| PER17 R    | AGATACAAGCAATACATCAATAG          | Genotyping                             |
| PER28 R    | ATTCGTCCTGATCTCACCAG             | Genotyping                             |
| PER29 R    | CTTCTAATTACTCCTTCATTCC           | Genotyping                             |

|          |                          |                                |
|----------|--------------------------|--------------------------------|
| LBb1     | ATTTCGGAACCACCATCAAAC    | Genotyping                     |
| Sail_LB  | CATAACCAATCTCGATACACC    | Genotyping                     |
| PER17P F | TTATTGATATCCTCTCTTCTTTTG | <i>PER17::GUS</i><br>construct |
| PER17P R | ACTTTTTTCTTTTTTGGTGTTGTG | <i>PER17::GUS</i><br>construct |
| PER28P F | TGATCAGATTCGTTTGGGTC     | <i>PER28::GUS</i><br>construct |
| PER28P R | CTTGTTTTTGTAGAAAGTGTTGC  | <i>PER28::GUS</i><br>construct |
| PER29P F | CATTCGATGTACGTATTACTAG   | <i>PER29::GUS</i><br>construct |
| PER29P R | AACTTCTCTTTTGTTTGGAATTT  | <i>PER29::GUS</i><br>construct |

---

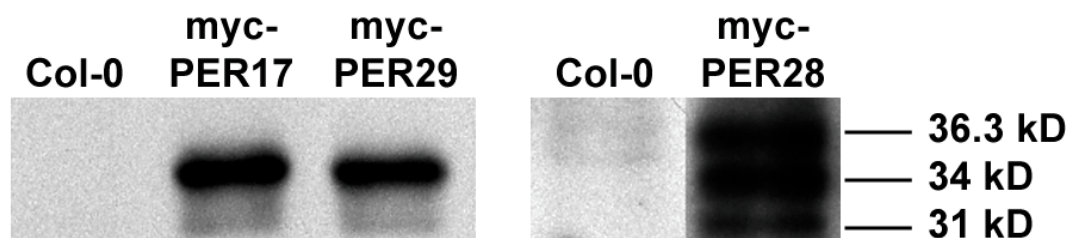

**Supplemental Figure S1.** Protein expression of myc-PER17 (38.6 kD), myc-PER28 and myc-PER29 (38.4 kD) was detectable using an anti-myc antibody. Other than the predicted 36.3 kD myc-PER28 shown in the immunoblot, two more bands were revealed, possibly due to cryptic splice sites in the myc-*PER28* construct or degradation of this protein during extraction.
